# Supplementary material for: Evolution and structure of clinically relevant gene fusions in multiple myeloma
Source: PubMed Central journal article supplement (PMC7260243; doi:10.1038/s41467-020-16434-y), 2020-05-29
Supplement: 41467_2020_16434_MOESM3_ESM.pdf [file 41467_2020_16434_MOESM3_ESM.pdf]

## Description of Additional Supplementary Files

File Name: Supplementary Data 1

Description: **Patient Info.** Patient clinical information and sequencing data availability.

File Name: Supplementary Data 2

Description: **Patient list.** List of all patients and samples included.

File Name: Supplementary Data 3

Description: **Fusion Calls.** Fusion calls from primary and secondary samples.

File Name: Supplementary Data 4

Description: **Overexpressed.** Genes showing significant overexpression in fusions samples.

Association testing was done using Student's t-test (two-sided) (continuous expression) and Fisher's Exact Test (two-sided) (categorical expression).

File Name: Supplementary Data 5

Description: **Kinases.** Kinase fusion annotation including intact kinase domains.

File Name: Supplementary Data 6

Description: **Fusion Filtering.** Fusions removed from analysis through soft filters.
